# Supplementary material
Source: PubMed Central journal article supplement (PMC10288523)
Supplement: NIHMS1890027-supplement-supplemental_material.pdf [file NIHMS1890027-supplement-supplemental_material.pdf]

**Table 6. (Data not shown in text) Respondents' choice of study type by gender.**

|                 | Female | Male  | Overall     |
|-----------------|--------|-------|-------------|
| Survey          | 78.7%  | 72.2% | 341 (76.1%) |
| Focus Groups    | 37.5%  | 27.3% | 150 (33.5%) |
| Clinical Trials | 28.7%  | 25.6% | 123 (27.5%) |
| Genetic Studies | 37.5%  | 31.8% | 158 (35.5%) |
| Total           | 272    | 176   | 448         |

\* Percents do not add to 100 because more than one selection could be made.

**Table 7. (Data not shown in text) Percentage of respondents willing to give sample, information or undergo testing or procedure for health related research studies**

| <b>Sample</b>  | <b>Percent willing to contribute</b> |
|----------------|--------------------------------------|
| Blood          | 67%                                  |
| Saliva         | 65%                                  |
| Hair           | 70%                                  |
| Urine/Feces    | 60.9%                                |
| Blood Pressure | 70.7%                                |
| Height/Weight  | 70.3%                                |
| Memory Testing | 51.8%                                |
| MRI Scan       | 28.8%                                |
